# Supplementary material for: Prion Infectivity and PrPBSE in the Peripheral and Central Nervous System of Cattle 8 Months Post Oral BSE Challenge
Source: MDPI journal article supplement (doi:10.3390/ijms222111310), 2021-10-20
Supplement: s1 [file s1]

| Tissue sample                                                | CC 01 (8 mpi) |       |             | CC 02 (8 mpi) |       |             |
|--------------------------------------------------------------|---------------|-------|-------------|---------------|-------|-------------|
|                                                              | IHC           | PMCA  | BA          | IHC           | PMCA  | BA          |
| <b>Obex</b>                                                  | neg.          | n. d. | n. d.       | neg.          | n. d. | n. d.       |
| <b>Cranial medulla</b>                                       | n. d.         | neg.  | 0/20, > 730 | n. d.         | neg.  | 0/20, > 730 |
| <b>Ganglion coeliacum</b>                                    | neg.          | neg.  | 0/20, > 732 | neg.          | neg.  | 0/20, > 729 |
| <b>Ganglion mesenteriale caudale</b>                         | neg.          | neg.  | n. d.       | neg.          | neg.  | n. d.       |
| <b>Nervus splanchnicus major</b>                             | neg.          | neg.  | 0/20, > 732 | neg.          | neg.  | 0/20, > 741 |
| <b>Truncus sympathicus<br/>(incl. paravertebral ganglia)</b> | neg.          | o. a. | n. d.       | neg.          | o. a. | n. d.       |
| <b>Nervus vagus (thoracic part)</b>                          | neg.          | neg.  | 0/20, > 733 | neg.          | neg.  | 0/19, > 733 |
| <b>Thoracic spinal cord T7</b>                               | neg.          | neg.  | 0/20, > 740 | neg.          | o. a. | 0/19, > 740 |
| <b>Frontal cortex</b>                                        | n. d.         | o. a. | n. d.       | n. d.         | o. a. | n. d.       |
| <b>Cerebellum</b>                                            | n. d.         | o. a. | 0/19, > 753 | n. d.         | o. a. | 0/19, > 745 |
| <b>Ganglion cervicale craniale</b>                           | n. d.         | o. a. | n. d.       | n. d.         | o. a. | n. d.       |
| <b>Ganglion stellatum</b>                                    | n. d.         | o. a. | n. d.       | n. d.         | o. a. | n. d.       |
| <b>Ganglion nodosum</b>                                      | n. d.         | o. a. | 0/20, > 741 | n. d.         | o. a. | 0/20, > 740 |
| <b>Ganglion trigeminale</b>                                  | n. d.         | o. a. | 0/20, > 742 | n. d.         | o. a. | 0/19, > 740 |
