# Supplementary material for: Prion Infectivity and PrPBSE in the Peripheral and Central Nervous System of Cattle 8 Months Post Oral BSE Challenge
Source: MDPI journal article supplement (doi:10.3390/ijms222111310), 2021-10-20
Supplement: s1 [file s1]

| Time point post<br>infection | Animal ID | Thoracic spinal<br>cord |
|------------------------------|-----------|-------------------------|
|                              |           | PMCA                    |
| 4 months<br>(n = 2)          | IT 19     | neg.                    |
|                              | IT 45     | neg.                    |
| 8 months<br>(n = 2)          | IT 14     | neg.                    |
|                              | IT 20     | ++                      |
|                              | IT 39     | ++                      |
|                              | IT 55     | neg.                    |
